# Supplementary material for: High rate capability caused by surface cubic spinels in Li-rich layer-structured cathodes for Li-ion batteries
Source: PubMed Central journal article supplement (PMC3813932; doi:10.1038/srep03094), 2013-10-31
Supplement: srep03094-s1.pdf [file srep03094-s1.pdf]

## Supporting Information

### **High rate capability caused by surface cubic spinels in Li-rich layer-structured cathodes for Li-ion batteries**

Bohang Song<sup>1</sup>, Hongwei Liu<sup>2</sup>, Zongwen Liu<sup>2</sup>, Pengfei Xiao<sup>1</sup>, Man On Lai<sup>1</sup>, Li Lu<sup>1,\*</sup>

<sup>1</sup> Materials Science Group, Department of Mechanical Engineering

National University of Singapore, Singapore

<sup>2</sup> School of Chemical and Biomolecular Engineering

The University of Sydney, Australia

\* Correspondence to [luli@nus.edu.sg](mailto:luli@nus.edu.sg)

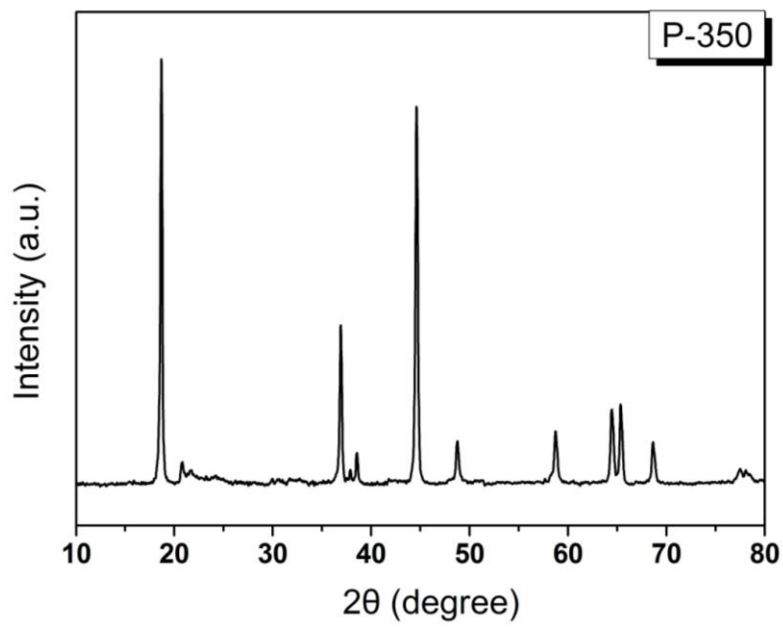

**Fig. S1** XRD pattern of the P-350 powder.

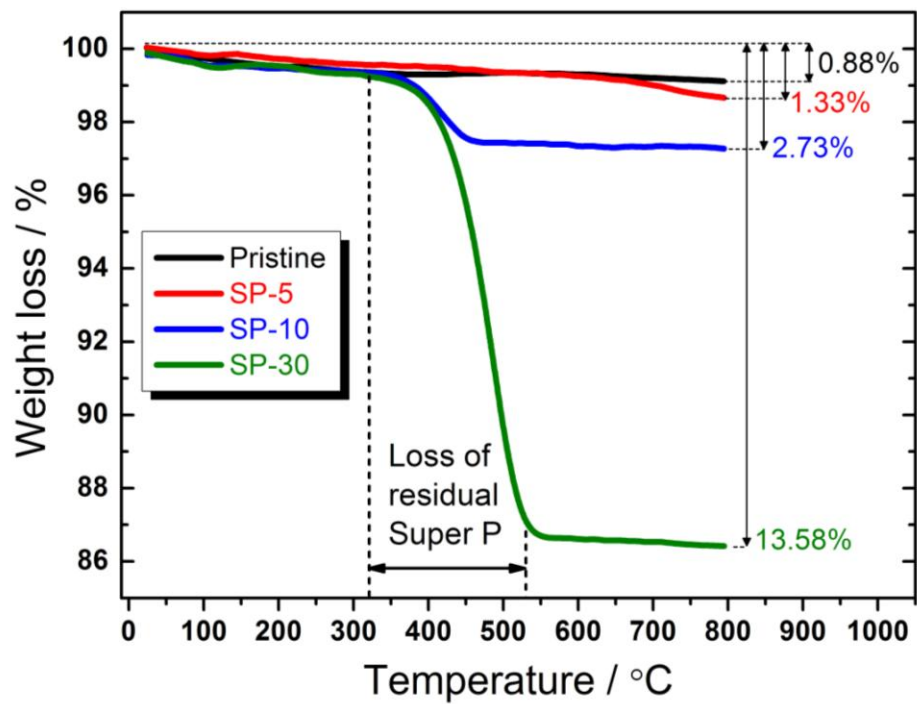

**Fig. S2** TGA plots of pristine, SP-5, SP-10 and SP-30 powders. (Heating rate =  $5\text{ }^{\circ}\text{C}\cdot\text{min}^{-1}$  under an air atmosphere).

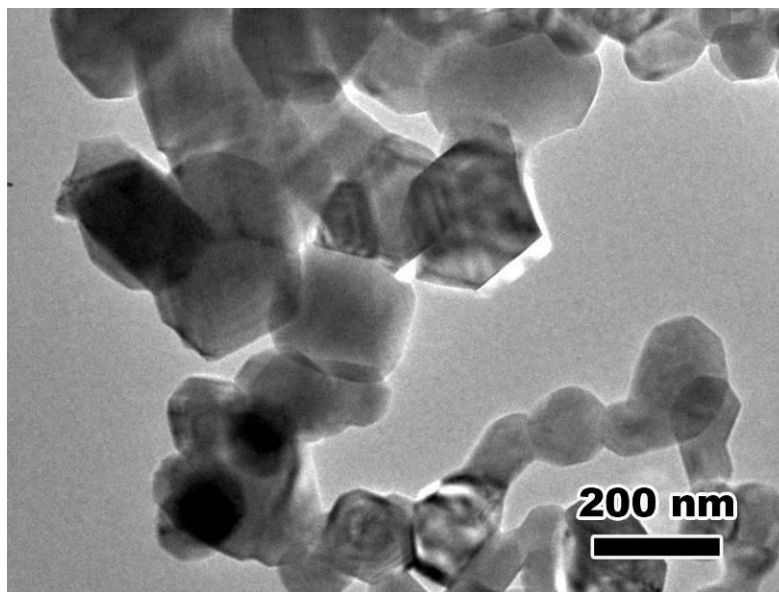

**Fig. S3** Bright field TEM image of the pristine Li(Li<sub>0.2</sub>Mn<sub>0.54</sub>Ni<sub>0.13</sub>Co<sub>0.13</sub>)O<sub>2</sub> particles.

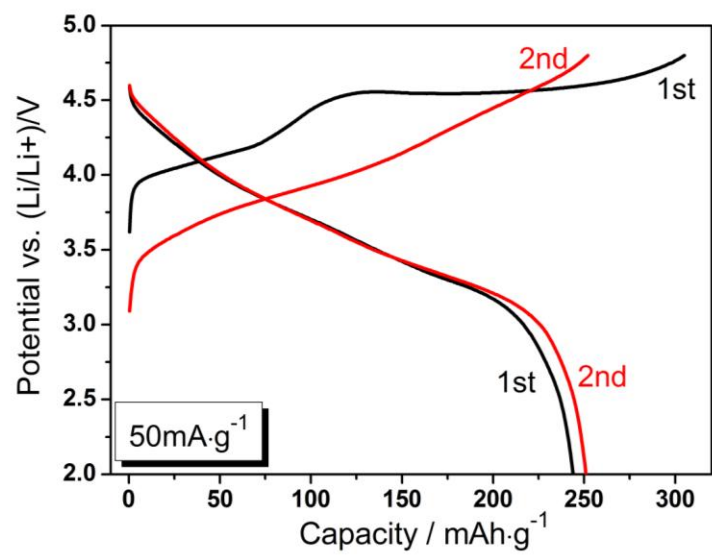

**Fig. S4** Charge/discharge curves of first two cycles of P-350 electrode cycled at 50 mA g<sup>-1</sup>.

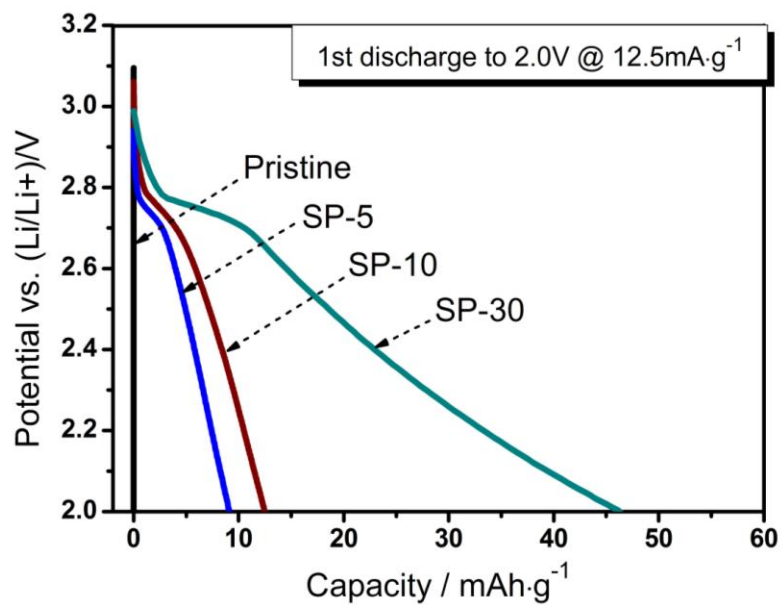

**Fig. S5** First discharge curves from OCP to 2.0 V started from fresh cells containing these cathodes at 12.5 mA g<sup>-1</sup>.

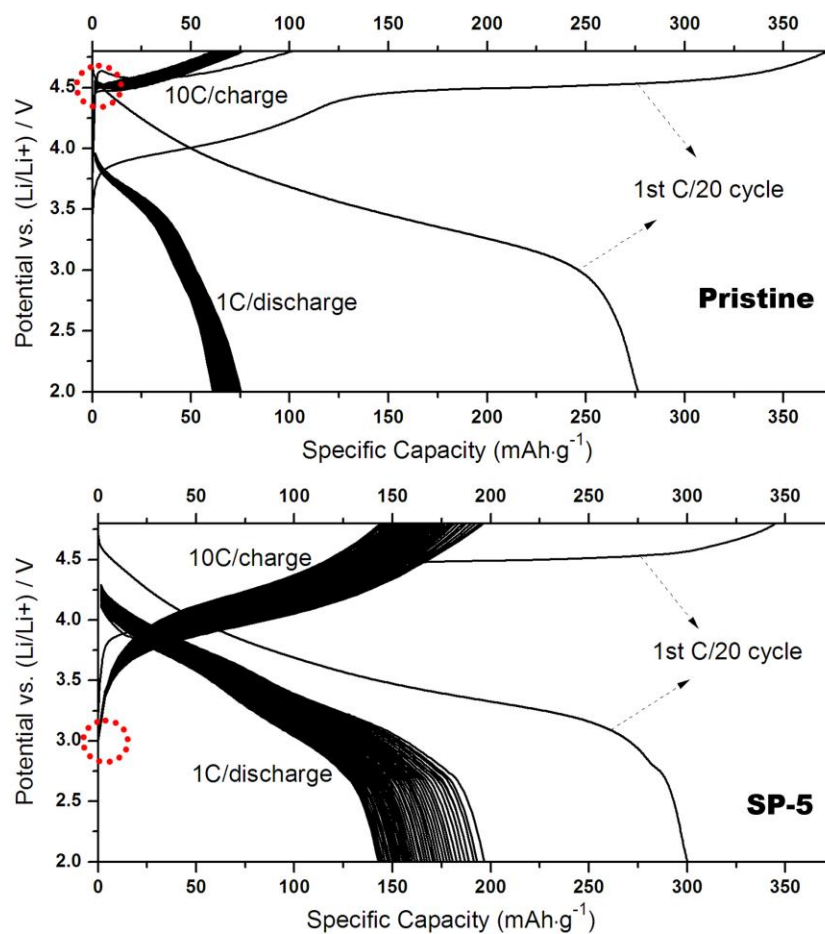

**Fig. S6** 10C-charge/1C-discharge curves after an initial forming cycle of both pristine and SP-5 cathodes cycled between 2.0 and 4.8 V where 1 C corresponds to 250 mA·g<sup>-1</sup>.

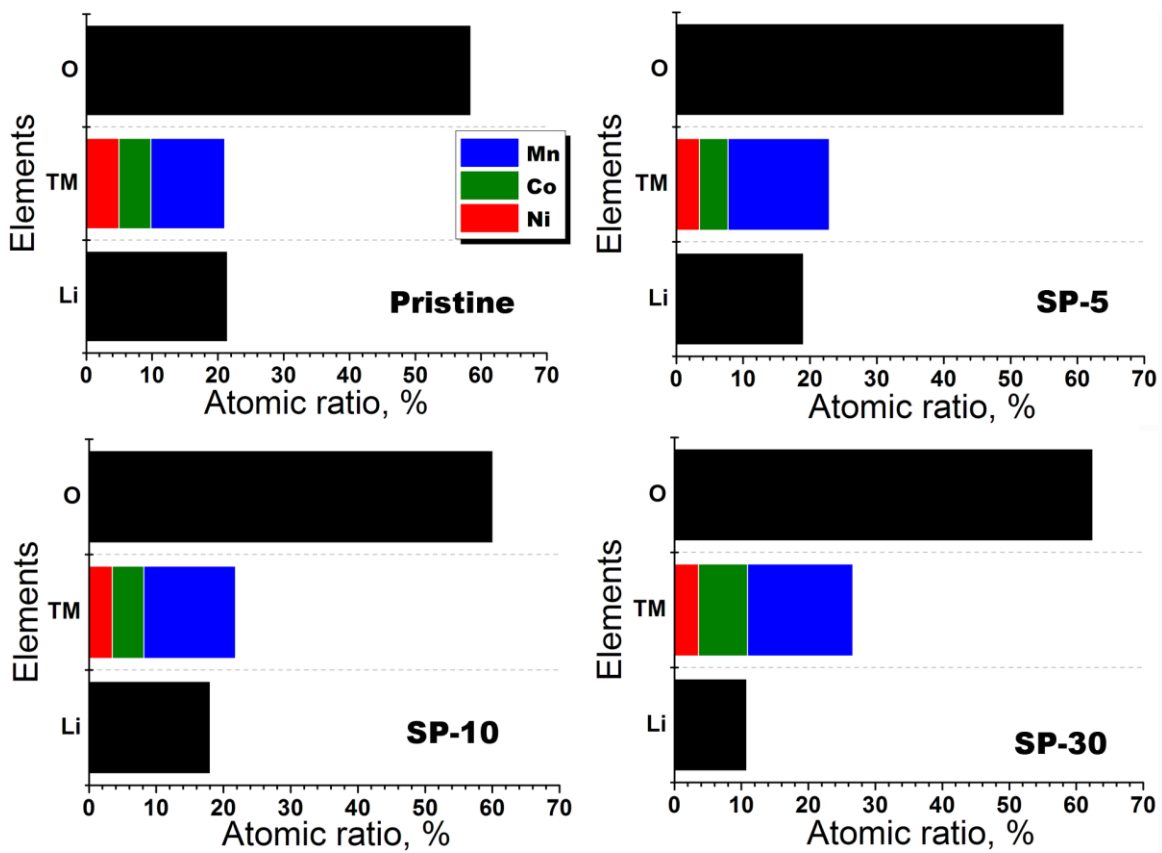

**Fig. S7** Surface analysis of chemical composition using XPS technique with respect to pristine, SP-5, SP-10 and SP-30 samples.



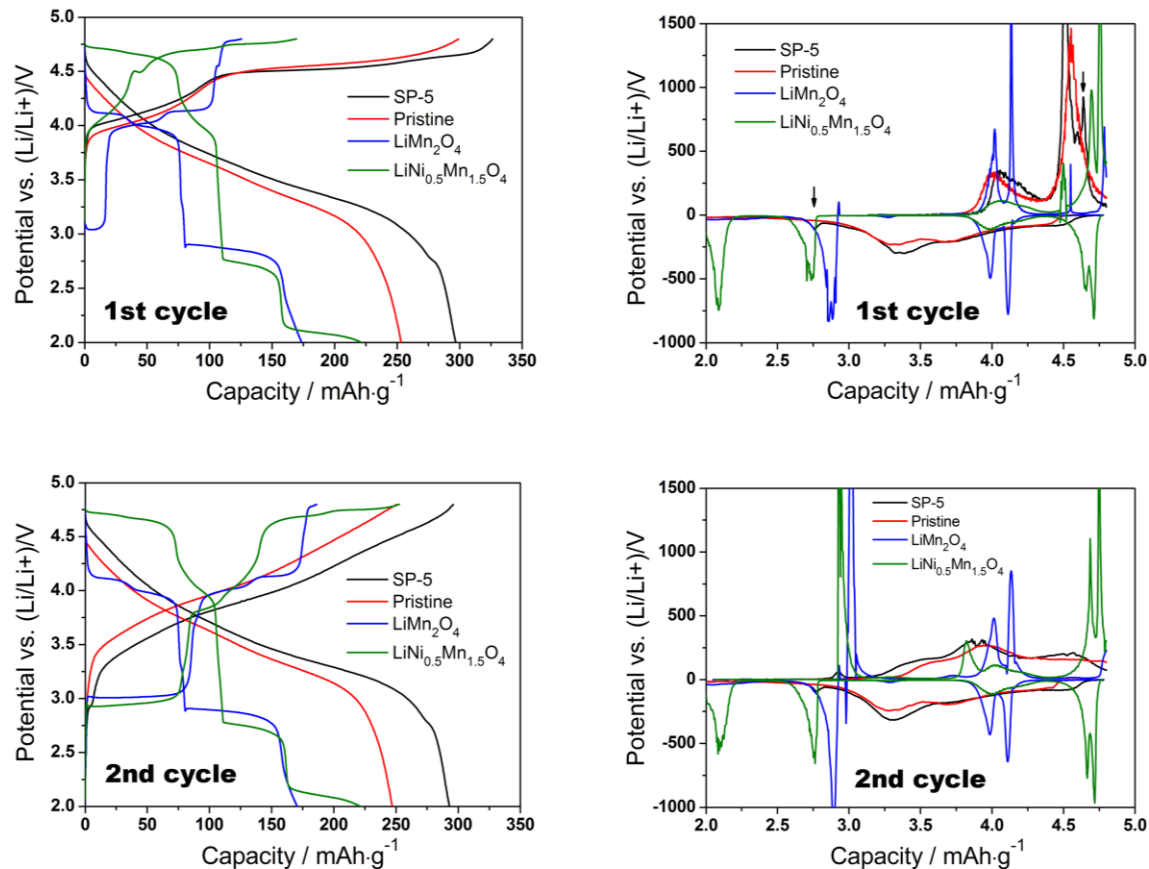

**Fig. S8** Charge/discharge curves and corresponding  $dQ/dV$  plots of SP-5, pristine,  $\text{LiMn}_2\text{O}_4$  and  $\text{LiNi}_{0.5}\text{Mn}_{1.5}\text{O}_4$  cycled between 2.0 and 4.8 V at  $50 \text{ mA g}^{-1}$ . As can be seen from  $dQ/dV$  plots of first cycle, although the additional peak (marked as  $\downarrow$ ) in charging process of SP-5 located at 4.64 V is comparable to the peak (4.70 V) only observed for  $\text{LiNi}_{0.5}\text{Mn}_{1.5}\text{O}_4$  sample, they are not located at the exactly same position (two electrodes possess similar loading density). Besides, upon first discharging process, two peaks (4.65 and 4.72 V) observed for  $\text{LiNi}_{0.5}\text{Mn}_{1.5}\text{O}_4$  are both missing for SP-5 sample, indicating different intercalation mechanisms in this voltage region. Additionally, the newly-formed peak (2.76 V) upon discharge for SP-5 sample is in between 2.72 V ( $\text{LiMn}_2\text{O}_4$ ) and 2.82 V ( $\text{LiNi}_{0.5}\text{Mn}_{1.5}\text{O}_4$ ), also indicating spinel behavior rather than exact  $\text{LiMn}_2\text{O}_4$  or  $\text{LiNi}_{0.5}\text{Mn}_{1.5}\text{O}_4$ . The second cycle also suggests similar conclusion.
